# Supplementary material for: Biphasic dissolving microneedles with cyclodextrin inclusion complexes for enhanced delivery of poorly soluble drugs
Source: Royal Society of Chemistry journal article supplement (doi:10.1039/d5ra08424e), 2026-01-01
Supplement: d5ra08424e1.pdf [file d5ra08424e1.pdf]

## **Supplementary Information**

### **Biphasic dissolving microneedles with cyclodextrin inclusion complexes for enhanced delivery of poorly soluble drugs**

Runze Wang<sup>1</sup>, Jiaqi Cao<sup>1</sup>, Jing Zou<sup>1</sup>, Rui Zhang<sup>1</sup>, Mengmeng Li<sup>1</sup>, Wanglong Zhang<sup>1</sup>,  
Mintong Guo<sup>1,2</sup>

<sup>1</sup> School of Pharmaceutical Sciences, Zhengzhou University, Zhengzhou, Henan, China

<sup>2</sup> Pingyuan Laboratory, State Key Laboratory of Antiviral Drugs, Xinxiang, Henan, China

## Supplementary Figure 1

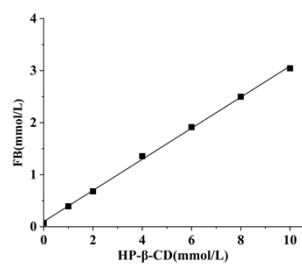

**Supplementary Figure S1.** The phase solubility of flurbiprofen (FB)/HP-β-CD inclusion complex.

## Supplementary Figure 2

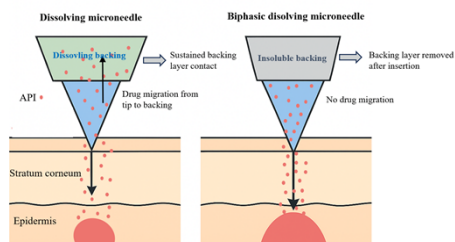

**Supplementary Figure S2.** Schematic illustration comparing the structural design and drug delivery mechanisms between conventional dissolving microneedles and biphasic dissolving microneedles. In the conventional dissolving microneedle system (left), the drug may diffuse from the needle tips toward the water-soluble backing layer after skin insertion, resulting in partial drug loss and decreased transdermal delivery efficiency. In contrast, the biphasic dissolving microneedle system (right) incorporates an insoluble backing layer that is physically removed after insertion. This design minimizes drug back-diffusion and enables concentrated drug release within the intended skin layer.

## Supplementary Table 1

| Factor levels | Molar ratio | Temperature (°C) | Reaction Time (h) |
|---------------|-------------|------------------|-------------------|
| 1             | 1:1         | 20               | 4                 |
| 2             | 1:2         | 40               | 6                 |
| 3             | 1:3         | 60               | 8                 |

**Supplementary Table S1:** Factor levels used in the orthogonal experimental design. This table presents the three-level settings for each factor investigated in the L9(3<sup>3</sup>) orthogonal design. The experimental factors included the molar ratio of drug to cyclodextrin, reaction temperature, and reaction time, each tested at three defined levels.

**Supplementary Table 2**

| No.            | Molar ratio | Temperature (°C) | Reaction time (h) | S <sub>1</sub> (%) | S <sub>2</sub> (%) | S     |
|----------------|-------------|------------------|-------------------|--------------------|--------------------|-------|
| 1              | 1:1         | 20               | 4                 | 91.33              | 72.2               | 73.85 |
| 2              | 1:1         | 40               | 8                 | 92.72              | 77.8               | 77.47 |
| 3              | 1:1         | 60               | 6                 | 94.32              | 80.48              | 83.33 |
| 4              | 1:2         | 20               | 8                 | 94.08              | 62.5               | 67.40 |
| 5              | 1:2         | 40               | 6                 | 96.45              | 53.67              | 78.23 |
| 6              | 1:2         | 60               | 4                 | 96.07              | 66.42              | 63.02 |
| 7              | 1:3         | 20               | 6                 | 96.19              | 45.64              | 63.03 |
| 8              | 1:3         | 40               | 4                 | 92.03              | 32.03              | 61.91 |
| 9              | 1:3         | 60               | 8                 | 91.49              | 56.66              | 56.66 |
| K <sub>1</sub> | 220.48      | 170.34           | 160.65            |                    |                    |       |
| K <sub>2</sub> | 182.59      | 163.5            | 179.79            |                    |                    |       |
| K <sub>3</sub> | 134.33      | 203.56           | 196.96            |                    |                    |       |
| R              | 28.72       | 13.35            | 12.10             |                    |                    |       |

**Supplementary Table S2:** Experimental results and range analysis of the L9(3<sup>3</sup>) orthogonal design. S<sub>1</sub> and S<sub>2</sub> represent drug loading (%) and encapsulation efficiency (%), respectively. The evaluation index S was calculated as:  $S = 0.3 \times S_1 + 0.7 \times S_2$ . K<sub>1</sub>-K<sub>3</sub> denote the sum of S values at levels 1, 2, and 3 for each factor, and R is the range ( $R = \max_{(K)} - \min_{(K)}$ ), indicating the influence magnitude of each factor.

### Supplementary Table 3

| Materials     | Proportion (v/v, %) |
|---------------|---------------------|
| PUA-Cure 9110 | 54                  |
| HPMA          | 45                  |
| TPO           | 1                   |

**Supplementary Table S3:** The formulation of insoluble backing layer used for biphasic dissolving microneedles, expressed as volume percentages (v/v).

### Supplementary Table 4

| Materials       | Proportion (w/w, %) |
|-----------------|---------------------|
| HP- $\beta$ -CD | 30                  |
| HPMC E5         | 10                  |
| Water           | 60                  |

**Supplementary Table S4:** The formulation of the soluble backing layer used for evaluating the effect of backing materials on drug delivery efficiency.

### Supplementary Table 5

| Source            | SS       | DF | MS      | <i>F</i> | <i>P</i> |
|-------------------|----------|----|---------|----------|----------|
| Molar ratio       | 1242.945 | 2  | 621.472 | 21.227   | < 0.05   |
| Temperature (°C)  | 306.129  | 2  | 153.064 | 5.228    | > 0.05   |
| Reaction time (h) | 219.952  | 2  | 109.976 | 3.756    | > 0.05   |
| Error             | 58.556   | 2  | 29.278  |          |          |

**Supplementary Table S5.** Results of one-way ANOVA evaluating the effects of molar ratio, temperature, and time on the preparation of inclusion complexes. Abbreviations: SS, sum of squares; DF, degrees of freedom; MS, mean square; F, F-value; P, probability level. Note: Differences were considered statistically significant when  $P < 0.05$ .

## Supplementary Table 6

| Model            | Equation               | $R^2$ (F4-SB) | $R^2$ (F4-IB) | $k$ (F4-SB) | $k$ (F4-IB) | $n$ (F4-SB) | $n$ (F4-IB) |
|------------------|------------------------|---------------|---------------|-------------|-------------|-------------|-------------|
| Zero-order       | $Q_t = k_0 t$          | 0.962         | 0.913         | 4.27        | 2.53        | —           | —           |
| First-order      | $\ln(1-Q) = -k_1 t$    | 0.945         | 0.880         | 0.0780      | 0.0650      | —           | —           |
| Higuchi          | $Q_t = k_H t^{1/2}$    | 0.991         | 0.982         | 16.2        | 12.4        | —           | —           |
| Korsmeyer–Peppas | $Q_t/Q_\infty = k t^n$ | 0.986         | 0.974         | 15.5        | 11.0        | 0.489       | 0.612       |

**Supplementary Table S6.** Kinetic model fitting parameters for drug release from F4-SB (F4-soluble backing) and F4-IB (F4- Insoluble backing) formulation.

Abbreviations:

$Q_t$ , cumulative drug release at time  $t$ ;

$Q_\infty$ , total amount of drug released at infinite time;

$k_0$ , zero-order release constant;

$k$ , release rate constant for first-order, Higuchi, and Korsmeyer–Peppas models;

$n$ , release exponent in the Korsmeyer–Peppas model;

$R^2$ , coefficient of determination.
